# Supplementary material
Source: MDPI journal article supplement (https://www.mdpi.com/2075-163X/9/7/409)
Supplement: s1 [file s1]

Supplementary Figure S1: Time serial development in all six experimental treatments: **(S1.a)** the pH, **(S1.b)** the  $\text{Ca}^{2+}$  concentration, **(S1.c)** the  $\text{HCO}_3^-$  concentration and **(S1.d)** the saturation index (SI) of calcite. Open symbols show abiotic controls (blanks), closed symbols depict biological treatments

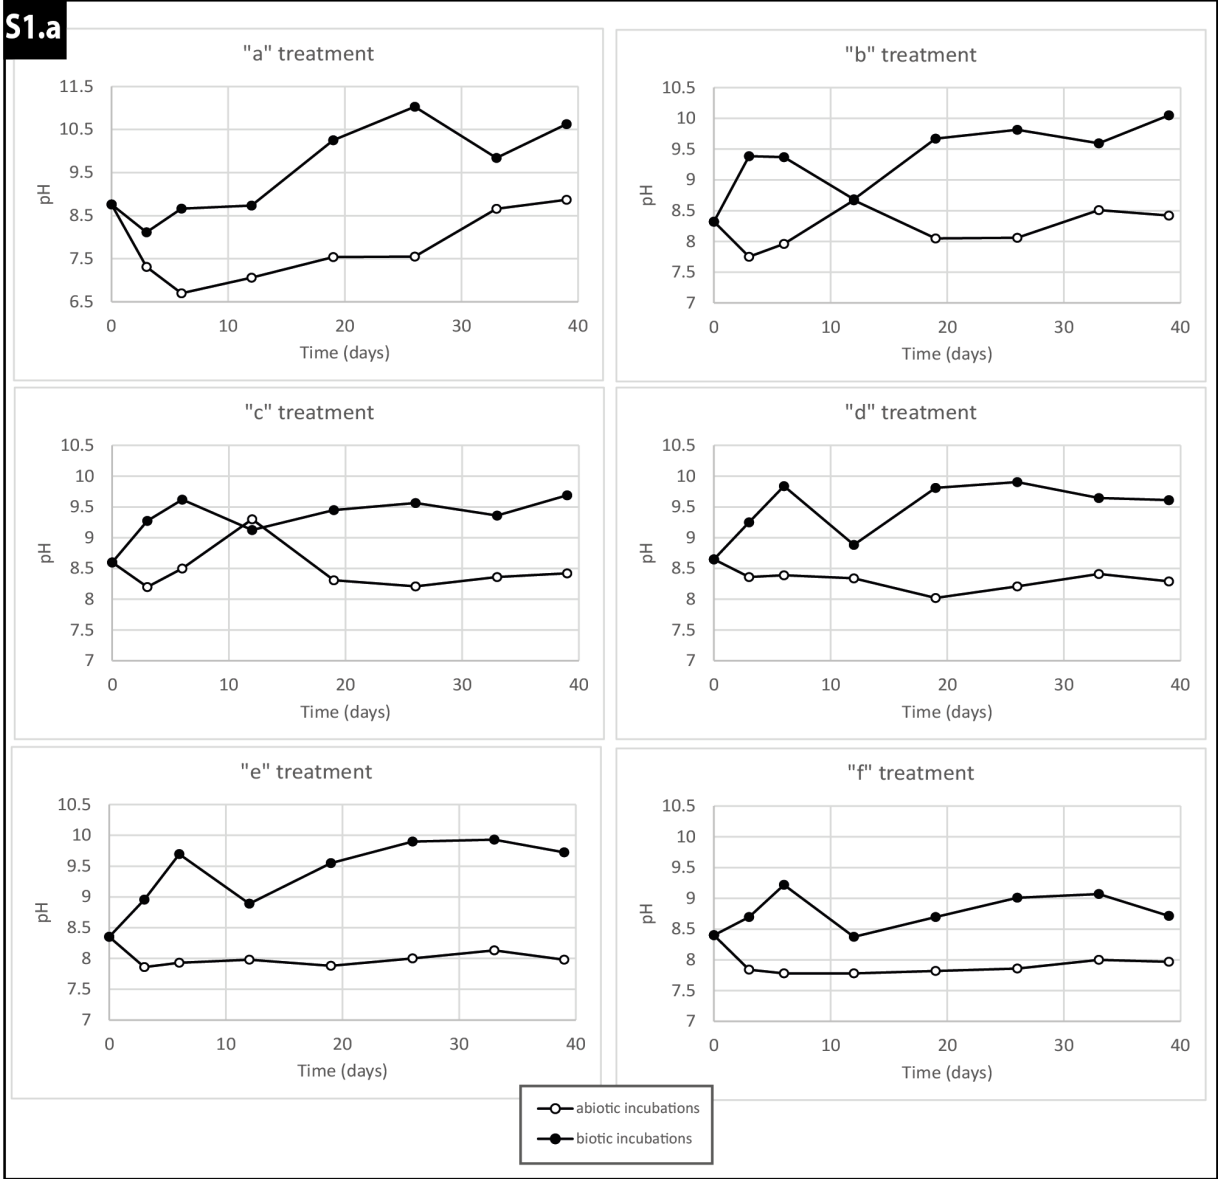

**S1.b**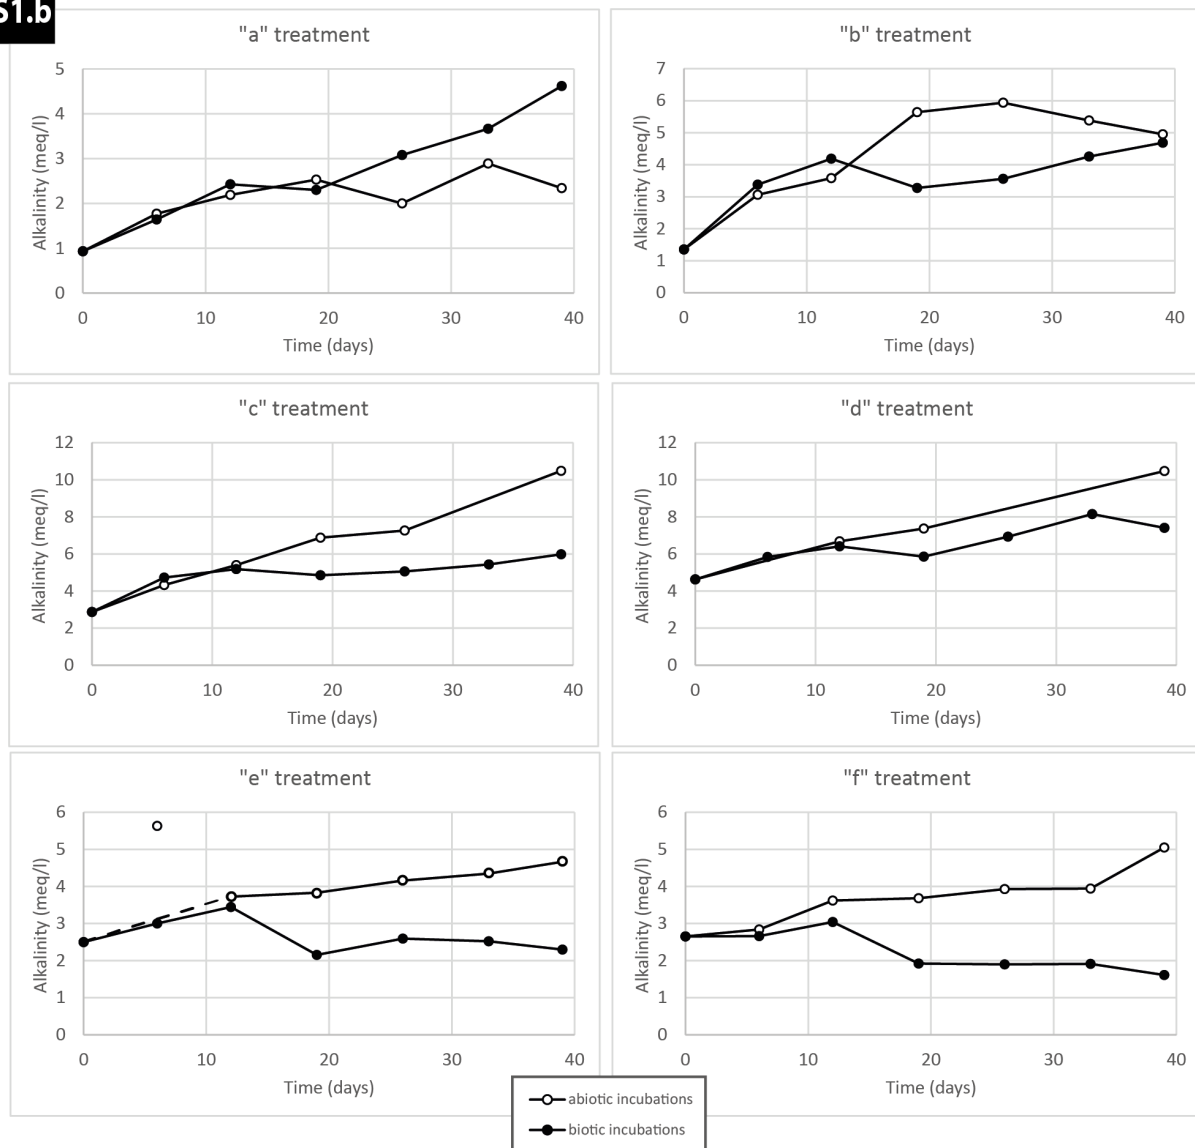

S1.c

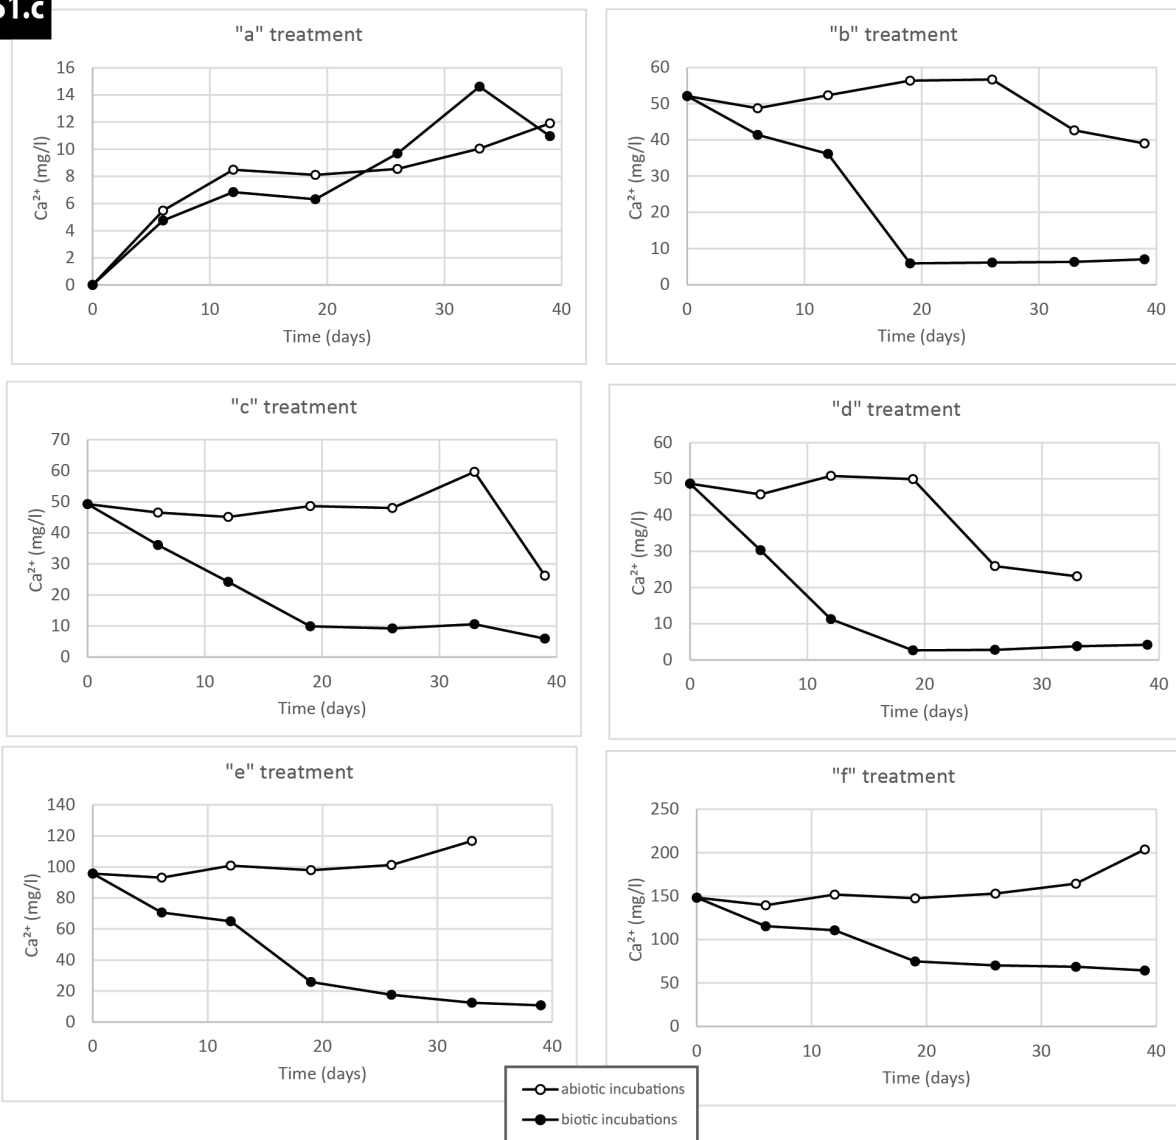

**S1.d**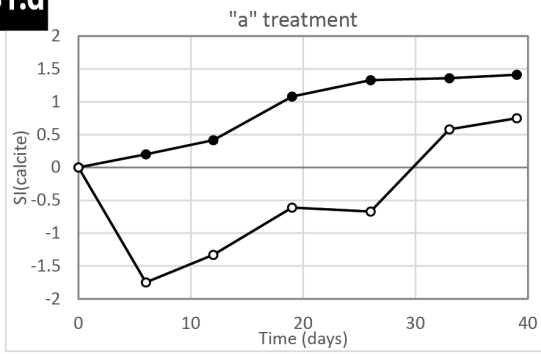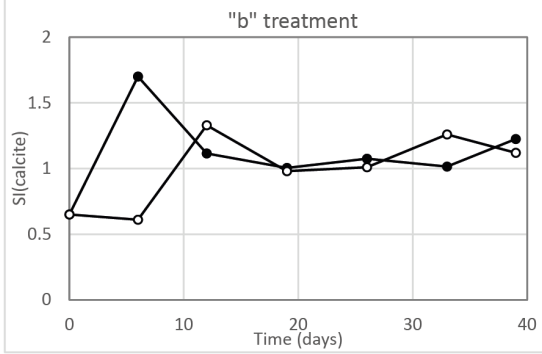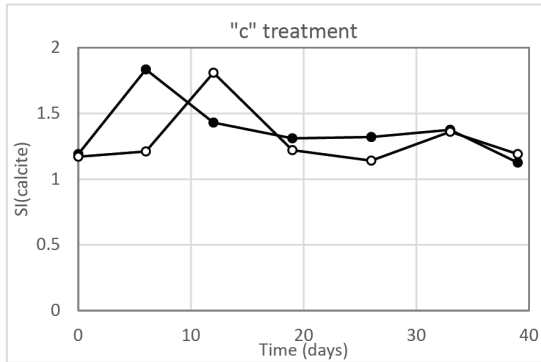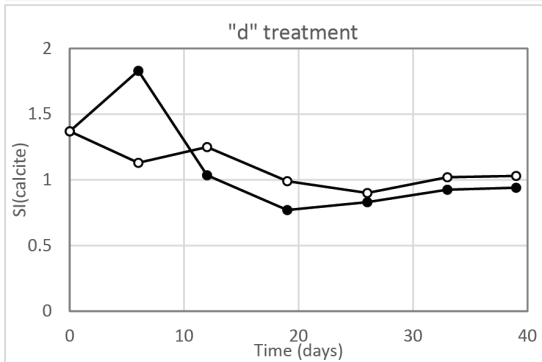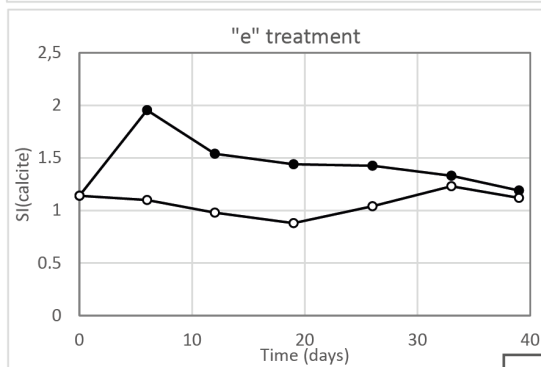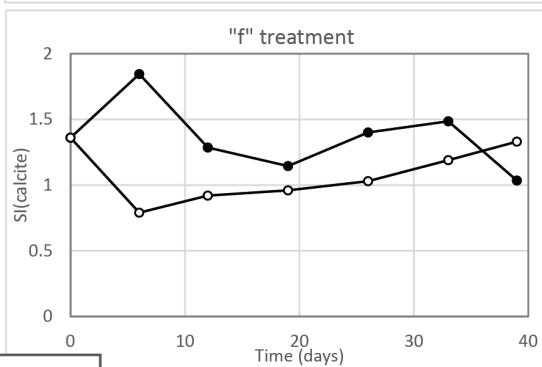

○ abiotic incubations  
● biotic incubations
